# Supplementary material
Source: PubMed Central journal article supplement (PMC3093530)
Supplement: 1101018108_pnas.201101018SI.pdf [file 1101018108_pnas.201101018SI.pdf]

# Supporting Information

Li et al. 10.1073/pnas.1101018108

**Table S1. Characteristics of the SLCP participating and nonparticipating households**

|                                                            | SLCP <sup>†</sup> | non-SLCP <sup>‡</sup> | F test <sup>§</sup> | Test of difference between two kinds of households <sup>  </sup> |
|------------------------------------------------------------|-------------------|-----------------------|---------------------|------------------------------------------------------------------|
| i. Family size, persons                                    | 4.1262 (1.331)    | 3.6707 (1.397)        | 4.605**             | 0.455*** (4.99)                                                  |
| ii. Female members, persons                                | 1.848 (0.952)     | 1.613 (0.935)         | 0.371               | 0.236*** (3.75)                                                  |
| iii. Adult labor, persons                                  | 2.80 (0.04)       | 2.64 (0.06)           | 1.77                | 0.16** (2.16)                                                    |
| iv. Male adult labor, persons                              | 1.530 (0.744)     | 1.460 (0.737)         | 0.144               | 0.07 (1.42)                                                      |
| v. Dependency ratio                                        | 0.4566 (0.534)    | 0.3833 (0.529)        | 0.229               | 0.073** (2.076)                                                  |
| vi. Fraction of household members above junior high school | 0.357 (0.292)     | 0.335 (0.308)         | 1.749               | 0.022 (1.09)                                                     |
| vii. HH's age                                              | 43.665 (11.406)   | 46.109 (13.42)        | 22.68***            | -2.44*** (-2.85)                                                 |
| viii. Education years of HH                                | 5.04 (3.06)       | 4.78 (2.89)           | 0.691               | 0.26 (1.29)                                                      |
| ix. Per capita farmland, mu                                | 11.326 (12.39)    | 21.1972 (11.63)       | 5.13**              | -9.87*** (-12.25)                                                |
| x. Per capita forestland, mu                               | 41.189 (63.11)    | 20.147 (34.67)        | 8.572***            | 21.04*** (5.67)                                                  |
| xi. Per capita sloping land, mu                            | 0.995 (1.31)      | 2.05 (1.18)           | 6.471***            | -1.055*** (-12.52)                                               |
| xii. Proportion of HH who are in CCP                       | 11.5%             | 6.8%                  |                     | **                                                               |
| xiii. Proportion of HH with some training                  | 4.9%              | 2.6%                  |                     | *                                                                |
| xiv. Proportion of HH with some skills <sup>  </sup>       | 6.7%              | 3.9%                  |                     | ***                                                              |
| xv. Proportion of male HH                                  | 77.2%             | 82.2%                 |                     | **                                                               |
| No. of observations                                        | 745               | 329                   | —                   | —                                                                |

CCP, Chinese Communist Party; HH, household heads. Adult labor means the population between 18 and 65 y old. The dependency ratio is the ratio of the sum of persons younger than 18 y old and above 65 y old divided by the total adult labor in the household. 1 mu = 666.67 m<sup>2</sup>, or 1 mu = 1/15 ha. \**P* = 0.10; \*\**P* = 0.05; \*\*\**P* = 0.01.

<sup>†</sup>Means and (in parentheses) SDs of the SLCP participating households.

<sup>‡</sup>Means and (in parentheses) SDs of the SLCP nonparticipating households.

<sup>§</sup>F statistic testing variance equality of the SLCP participating and nonparticipating households.

<sup>||</sup>Rows 1–11 show *t* test results. (Ordinary *t* test is used when the variances are equal, adjusted *t* test is used when the variances are not equal.) Rows 12–15 used the likelihood-ratio test.

<sup>||</sup>Skills refer to cooking, veterinary skill, beekeeping, knitting, etc.

**Table S2. Variables in the model for household income**

| Variables                                                                                      | Description of the variables                                   | Mean   | SD     |
|------------------------------------------------------------------------------------------------|----------------------------------------------------------------|--------|--------|
| Natural logarithm of net household income, <i>Y</i>                                            | Gross income in cash or in kind minus production cost          | 8.6205 | 0.9707 |
| Total adult labor, <i>X</i> <sub>1</sub>                                                       | Household's human capital                                      | 2.75   | 1.12   |
| Proportion of females in the household, <i>X</i> <sub>2</sub>                                  | Household structure                                            | 42.8%  | 0.174  |
| Proportion of household members with education above junior high school, <i>X</i> <sub>3</sub> | Household's human capital                                      | 0.3503 | 0.2971 |
| Telephone and cell phone cost in last month, <i>X</i> <sub>4</sub>                             | Household's social capital                                     | 59.152 | 82.499 |
| Area of household farmland, <i>X</i> <sub>5</sub>                                              | Natural capital and production structure                       | 52.7   | 45.40  |
| Area of household forestland, <i>X</i> <sub>6</sub>                                            | Natural capital and production structure                       | 129.9  | 223.90 |
| Household material capital*, <i>X</i> <sub>7</sub>                                             | Index for material capital of households                       | 0.1800 | 0.1227 |
| Proportion of the household's total labor time spent on plantation, <i>X</i> <sub>8</sub>      | The proportion of total labor time spent on crops and forestry | 0.9598 | 0.1565 |
| Total months of out-migration from the household last year, <i>X</i> <sub>9</sub>              | Sum of total months of out-migration last year                 | 6.03   | 7.76   |
| Participating in the SLCP? <i>D</i> <sub>1</sub>                                               | Dummy variable. If yes, the value is 1, if not, it is 0.       | 0.694  | 0.4609 |
| Within or near nature reserve? <i>D</i> <sub>2</sub>                                           | If yes, the value is 1; otherwise it is 0.                     | 0.7151 | 0.4516 |

\*See Li et al. (1) for an evaluation of household material capital, which is a standardized value computed from indicators of the size and type of the household residence and fixed assets such as car, tractor, motorcycle, TV, washing machine, etc.

1. Li XY, Dong Q, Rao XL (2007) On rural household vulnerability and its application in China. *Chin Rural Econ* 4:37–45.

**Table S3. Multivariate linear regression results for the household income function**

|                                                                         | Model 1           | Model 2           | Model 3           | Model 4           | Model 5           | Model 6          |
|-------------------------------------------------------------------------|-------------------|-------------------|-------------------|-------------------|-------------------|------------------|
| Constant                                                                | 8.321*** (0.217)  | 8.275*** (0.247)  | 7.597*** (0.330)  | 8.340*** (0.220)  | 8.309*** (0.220)  | 7.635*** (0.346) |
| Total adult labor                                                       | 0.101*** (0.029)  | 0.145*** (0.048)  | 0.094*** (0.029)  | 0.101*** (0.029)  | 0.100*** (0.029)  | 0.112** (0.054)  |
| Female proportion                                                       | 0.300* (0.160)    | 0.177 (0.296)     | 0.261 (0.160)     | 0.306* (0.161)    | 0.298* (0.161)    | 0.098 (0.301)    |
| Proportion of members with education above junior high school           | -0.092 (0.101)    | -0.208 (0.173)    | -0.086 (0.101)    | -0.088 (0.101)    | -0.093 (0.101)    | -0.142 (0.183)   |
| Area of household farmland                                              | 0.002*** (0.001)  | 0.002*** (0.001)  | 0.005*** (0.001)  | 0.002*** (0.001)  | 0.002*** (0.001)  | 0.005*** (0.001) |
| Area of household forestland                                            | 0.000* (0.000)    | 0.000* (0.000)    | 0.001* (0.001)    | 0.000* (0.000)    | 0.000* (0.000)    | 0.001* (0.001)   |
| Proportion of plantation labor time                                     | -0.935*** (0.181) | -0.916*** (0.182) | -0.439 (0.306)    | -0.937*** (0.181) | -0.944*** (0.182) | -0.425 (0.311)   |
| Months of out-migration                                                 | 0.019*** (0.004)  | 0.019*** (0.004)  | 0.021*** (0.007)  | 0.019*** (0.004)  | 0.019*** (0.004)  | 0.021*** (0.007) |
| Telephone cost last month                                               | 0.001** (0.000)   | 0.001** (0.000)   | 0.001** (0.000)   | 0.000 (0.001)     | 0.001** (0.000)   | 0.000 (0.001)    |
| Material capital                                                        | 1.668*** (0.243)  | 1.670*** (0.243)  | 1.599*** (0.244)  | 1.679*** (0.244)  | 1.798*** (0.455)  | 1.698*** (0.489) |
| If participating in SLCP                                                | 0.178*** (0.066)  | 0.222 (0.210)     | 1.234*** (0.389)  | 0.150* (0.086)    | 0.210* (0.114)    | 1.167*** (0.431) |
| If within or near nature reserve                                        | 0.144** (0.063)   | 0.143** (0.064)   | 0.156** (0.063)   | 0.146** (0.063)   | 0.142** (0.064)   | 0.158** (0.064)  |
| Interaction with total adult labor                                      |                   | -0.064 (0.055)    |                   |                   |                   | -0.025 (0.064)   |
| Interaction with female proportion                                      |                   | 0.169 (0.352)     |                   |                   |                   | 0.235 (0.356)    |
| Interaction with proportion of members with education above high school |                   | 0.173 (0.207)     |                   |                   |                   | (0.086) (0.219)  |
| Interaction with area of farmland                                       |                   |                   | -0.004*** (0.002) |                   |                   | -0.004** (0.002) |
| Interaction with area of forestland                                     |                   |                   | -0.001 (0.001)    |                   |                   | -0.001 (0.001)   |
| Interaction with proportion of plantation time                          |                   |                   | -0.751** (0.379)  |                   |                   | -0.760** (0.383) |
| Interaction with migration months                                       |                   |                   | -0.002 (0.008)    |                   |                   | -0.002 (0.009)   |
| Interaction with telephone cost last month                              |                   |                   |                   | 0.001 (0.001)     |                   | 0.000 (0.001)    |
| Interaction with material capital                                       |                   |                   |                   |                   | -0.178 (0.524)    | -0.117 (0.566)   |
| Adjusted $R^2$                                                          | 0.191             | 0.190             | 0.199             | 0.190             | 0.190             | 0.195            |
| Wald test <sup>†</sup>                                                  | 7.36 (1)***       | 2.30 (4)*         | 4.29 (5)***       | 3.81 (2)**        | 3.73 (2)**        | 2.22 (10)**      |
| Observations                                                            | 1,074             |                   |                   |                   |                   |                  |

\* $P = 0.10$ ; \*\* $P = 0.05$ ; \*\*\* $P = 0.01$ . SEs are in parentheses.

<sup>†</sup>The Wald test is the joint significance test for participating in the SLCP and its interaction terms.

**Table S4. Quantile regression analysis results for household income**

| Variables                                                           | 10% quantile      | 25% quantile     | 50% quantile      | 75% quantile     | 90% quantile     |
|---------------------------------------------------------------------|-------------------|------------------|-------------------|------------------|------------------|
| Constant                                                            | 5.821*** (0.390)  | 6.727*** (0.575) | 7.655*** (0.255)  | 8.469*** (0.360) | 9.238*** (0.452) |
| Total adult labor                                                   | 0.131*** (0.047)  | 0.040 (0.052)    | 0.105*** (0.023)  | 0.121*** (0.032) | 0.072* (0.041)   |
| Female proportion                                                   | 0.570* (0.306)    | 0.357 (0.309)    | 0.134 (0.129)     | -0.039 (0.170)   | -0.210 (0.223)   |
| Proportion of members<br>with education above<br>junior high school | 0.391** (0.184)   | 0.136 (0.185)    | 0.030 (0.082)     | 0.024 (0.113)    | 0.008 (0.151)    |
| Area of household farmland                                          | 0.012*** (0.003)  | 0.007*** (0.003) | 0.003** (0.001)   | 0.003 (0.002)    | 0.002 (0.002)    |
| Area of household forestland                                        | 0.000 (0.001)     | 0.001* (0.001)   | 0.001** (0.000)   | 0.000 (0.001)    | -0.000 (0.001)   |
| Proportion of plantation time                                       | -0.417 (0.345)    | -0.344 (0.508)   | -0.181 (0.233)    | -0.328 (0.328)   | -0.353 (0.397)   |
| Months of out-migration                                             | 0.026** (0.013)   | 0.033*** (0.013) | 0.026*** (0.005)  | 0.012* (0.007)   | 0.012 (0.009)    |
| Telephone cost last month                                           | 0.000 (0.001)     | 0.001 (0.001)    | 0.001*** (0.000)  | 0.001*** (0.000) | 0.001*** (0.000) |
| Material capital                                                    | 1.497*** (0.406)  | 1.588*** (0.443) | 1.353*** (0.196)  | 1.678*** (0.265) | 1.594*** (0.350) |
| If participating in SLCP                                            | 1.945*** (0.509)  | 1.733*** (0.671) | 1.029*** (0.302)  | 0.926** (0.429)  | 0.751 (0.571)    |
| If within or near nature reserve                                    | 0.217** (0.101)   | 0.257** (0.112)  | 0.155*** (0.051)  | 0.041 (0.070)    | 0.046 (0.010)    |
| Interaction with area of farmland                                   | -0.009*** (0.003) | -0.006** (0.003) | -0.001 (0.001)    | -0.002 (0.002)   | -0.001 (0.002)   |
| Interaction with area of forestland                                 | 0.000 (0.001)     | -0.001 (0.001)   | -0.001** (0.000)  | -0.0000 (0.000)  | 0.000 (0.001)    |
| Interaction with proportion<br>of plantation time                   | -1.061** (0.511)  | -0.960 (0.646)   | -0.786*** (0.293) | -0.715* (0.408)  | -0.678 (0.521)   |
| Interaction with months<br>of migration                             | 0.004 (0.014)     | -0.008 (0.015)   | -0.008 (0.006)    | -0.001 (0.008)   | -0.004 (0.011)   |
| Pseudo-R <sup>2</sup>                                               | 0.167             | 0.120            | 0.111             | 0.112            | 0.103            |

\*P = 0.10; \*\*P = 0.05; \*\*\*P = 0.01. SEs are in parentheses.
